# Supplementary material for: Synthesis and characterization of pure BiVO 4 and zirconium-doped BiVO 4 nanoparticles for supercapacitor and photocatalytic performance
Source: publisher site journal article supplement (doi:10.1515/zpch-2025-0100), 2025-10-21
Supplement: Supplementary file 1 [file j_zpch-2025-0100_suppl_001.docx]

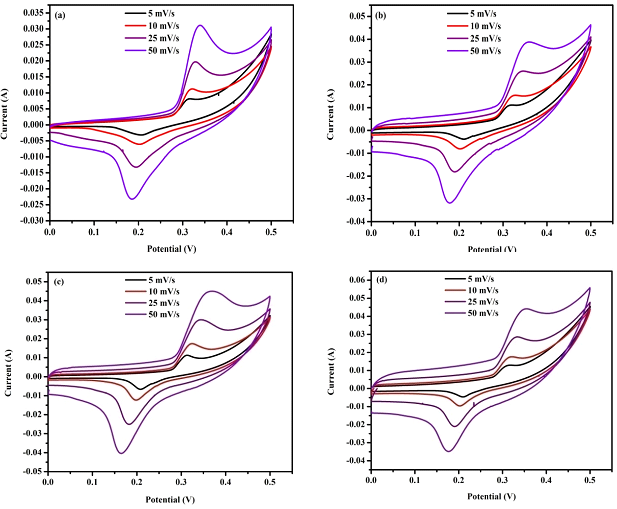


**Figure S1. CV curve of (a) Pure BiVO4 (b) BiVO4:Zr(2%) (c) BiVO4:Zr(4%)**

**(d) BiVO4:Zr(6%) electrodes at different scan rates**


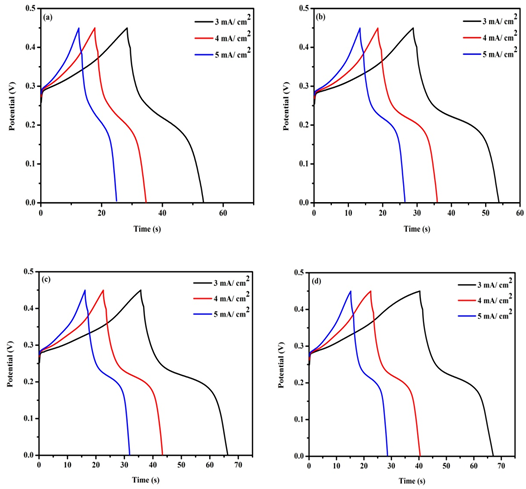


**Figure S2. Charge-discharge curve of (a) Pure BiVO4 (b) BiVO4:Zr(2%) (c) BiVO4:Zr(4%) (d) BiVO4:Zr(6%) electrodes at different current density**
